# Supplementary material for: Genotoxicity and Cytotoxicity Induced in Zygophyllum fabago by Low Pb Doses Depends on the Population’s Redox Plasticity
Source: MDPI journal article supplement (doi:10.3390/horticulturae7110455), 2021-11-03
Supplement: s1 [file s1]

## **Genotoxicity and cytotoxicity induced in *Zygophyllum fabago* depends on the population's redox plasticity**

Antonio López-Orenes<sup>1</sup>; Conceição Santos<sup>2</sup>; Maria Celeste Dias<sup>3</sup>; Helena Oliveira<sup>4</sup>; María Á. Ferrer<sup>1</sup>; Antonio A. Calderón<sup>1</sup>; Sónia Silva<sup>5\*</sup>

<sup>1</sup> Department of Agricultural Engineering, Universidad Politécnica de Cartagena, Paseo Alfonso XIII 48, 30203 Cartagena (Spain), mail: [antonio.orenes@upct.es](mailto:antonio.orenes@upct.es), mail: [mangeles.ferrer@upct.es](mailto:mangeles.ferrer@upct.es), mail: [antonio.calderon@upct.es](mailto:antonio.calderon@upct.es)

<sup>2</sup> Department of Biology & LAQV/REQUIMTE, Faculty of Sciences, University of Porto, Campo Alegre, 4169-007, Porto, Portugal mail: [csantos@fc.up.pt](mailto:csantos@fc.up.pt)

<sup>3</sup> Centre for Functional Ecology (CEF), Department of Life Science, University of Coimbra, Calçada Martim de Freitas, 3000-456 Coimbra (Portugal), mail: [celeste.dias@uc.pt](mailto:celeste.dias@uc.pt)

<sup>4</sup> Department of Biology, CESAM, University of Aveiro, Campus Universitário de Santiago, 3810-193 Aveiro, Portugal mail: [holiveira@ua.pt](mailto:holiveira@ua.pt)

<sup>5</sup> Department of Chemistry, LAQV-REQUIMTE, University of Aveiro, 3810-193 Aveiro, Portugal mail: [soniasilva@ua.pt](mailto:soniasilva@ua.pt)

\* Corresponding author

E-mail: [soniasilva@ua.pt](mailto:soniasilva@ua.pt)

Tel: + 351 234 370 766

fax: + 351 234 372 587

**Table S1:** Effect of Pb exposure on seed germination (%), shoot and root biomass and size, foliar RWC and photosynthetic pigments, and Pb accumulation seedling from non-mining (NM) and mining ('Agustin' and 'Mercader') *Z. fabago* populations exposed to 0, 5 and 20  $\mu\text{M}$   $\text{Pb}(\text{NO}_3)_2$  for 4 weeks. \*.

|                                         | 0 $\mu\text{M}$    | NM<br>5 $\mu\text{M}$ | 20 $\mu\text{M}$    | 0 $\mu\text{M}$    | 'Agustin'<br>5 $\mu\text{M}$ | 20 $\mu\text{M}$   | 0 $\mu\text{M}$     | 'Mercader'<br>5 $\mu\text{M}$ | 20 $\mu\text{M}$    |
|-----------------------------------------|--------------------|-----------------------|---------------------|--------------------|------------------------------|--------------------|---------------------|-------------------------------|---------------------|
| <b>Germination (%)</b>                  |                    |                       |                     |                    |                              |                    |                     |                               |                     |
| Day 6                                   | 71.67 $\pm$ 8.23   | 23.33 $\pm$ 5.21      | 25.00 $\pm$ 6.15 bB | 76.67 $\pm$ 8.81   | 86.67 $\pm$ 6.87             | 75.00 $\pm$ 5.89   | 26.67 $\pm$ 5.32    | 36.67 $\pm$ 6.58 aB           | 28.33 $\pm$ 4.11 aB |
| Day 12                                  | 76.67 $\pm$ 6.86   | 55.00 $\pm$ 3.29      | 50.00 $\pm$ 4.88 bB | 93.33 $\pm$ 8.11   | 95.00 $\pm$ 7.65             | 76.67 $\pm$ 6.28   | 68.33 $\pm$ 6.59 aB | 80.00 $\pm$ 7.99 aA           | 71.67 $\pm$ 7.18 aA |
| Day 18                                  | 76.67 $\pm$ 4.79   | 55.00 $\pm$ 5.77      | 54.00 $\pm$ 6.53 bB | 93.33 $\pm$ 6.98   | 95.00 $\pm$ 6.56             | 78.33 $\pm$ 7.54   | 78.33 $\pm$ 7.85    | 81.67 $\pm$ 6.59 aA           | 76.67 $\pm$ 7.12 aA |
| <b>Shoots</b>                           |                    |                       |                     |                    |                              |                    |                     |                               |                     |
| Biomass (mg)                            | 51.7 $\pm$ 4.07 aB | 37.5 $\pm$ 3.28 bC    | 35.4 $\pm$ 2.96 bB  | 79.2 $\pm$ 10.2 aA | 62.3 $\pm$ 8.96 aB           | 77.1 $\pm$ 6.84 aA | 96.4 $\pm$ 7.69 aA  | 119.9 $\pm$ 6.28 aA           | 100.3 $\pm$ 9.87 aA |
| Size (cm)                               | 2.2 $\pm$ 0.08 aC  | 1.3 $\pm$ 0.15 bC     | 1.0 $\pm$ 0.06 bC   | 2.9 $\pm$ 0.13 aB  | 2.5 $\pm$ 0.17 aB            | 2.5 $\pm$ 0.21 aB  | 4.1 $\pm$ 0.38 aA   | 3.6 $\pm$ 0.31 aA             | 4.0 $\pm$ 0.42 aA   |
| RWC (%)                                 | 71.9 $\pm$ 1.21 aB | 78.0 $\pm$ 1.75 aB    | 65.6 $\pm$ 3.31 aB  | 76.0 $\pm$ 1.25 bB | 87.9 $\pm$ 2.10 aA           | 87.2 $\pm$ 1.78 aA | 72.8 $\pm$ 1.56 bB  | 85.4 $\pm$ 2.15 aA            | 82.2 $\pm$ 1.00 aA  |
| <b>Leaves</b>                           |                    |                       |                     |                    |                              |                    |                     |                               |                     |
| Chl <i>a</i> ( $\mu\text{g g}^{-1}$ FW) | 123.8 $\pm$ 2.51   | 105.1 $\pm$ 0.47      | 96.3 $\pm$ 3.07 bC  | 161.8 $\pm$ 1.07   | 93.6 $\pm$ 4.11 bB           | 111.2 $\pm$ 1.04   | 205.4 $\pm$ 1.72    | 184.7 $\pm$ 6.34 bA           | 192.2 $\pm$ 2.57 bA |
| Chl <i>b</i> ( $\mu\text{g g}^{-1}$ FW) | 79.0 $\pm$ 1.57 aC | 75.4 $\pm$ 0.67       | 72.0 $\pm$ 2.63 bC  | 103.3 $\pm$ 0.55   | 77.3 $\pm$ 2.75 bB           | 82.4 $\pm$ 1.02 bB | 116.3 $\pm$ 0.75    | 109.8 $\pm$ 3.43 bA           | 110.7 $\pm$ 1.63 bA |
| Car ( $\mu\text{g g}^{-1}$ FW)          | 27.8 $\pm$ 0.83 aC | 24.1 $\pm$ 0.19 bB    | 24.9 $\pm$ 0.52 bC  | 41.7 $\pm$ 0.30 aA | 39.6 $\pm$ 0.84 aA           | 42.2 $\pm$ 0.35 aA | 38.3 $\pm$ 0.88 aB  | 40.9 $\pm$ 0.96 aA            | 40.0 $\pm$ 0.46 aB  |
| <b>Roots</b>                            |                    |                       |                     |                    |                              |                    |                     |                               |                     |
| Biomass (mg)                            | 40.2 $\pm$ 2.87 aB | 23.9 $\pm$ 3.90 bC    | 27.0 $\pm$ 4.12 bB  | 98.1 $\pm$ 11.75   | 88.1 $\pm$ 5.92 aB           | 90.7 $\pm$ 6.71 aA | 105.6 $\pm$ 9.65    | 115.9 $\pm$ 10.89             | 100.9 $\pm$ 7.92 aA |
| Size (cm)                               | 4.6 $\pm$ 0.13 aB  | 3.8 $\pm$ 0.22 abC    | 3.3 $\pm$ 0.12 bC   | 8.9 $\pm$ 1.71 aA  | 7.8 $\pm$ 0.32 aB            | 6.1 $\pm$ 0.66 aB  | 10.4 $\pm$ 2.56 aA  | 12.5 $\pm$ 1.66 aA            | 11.5 $\pm$ 1.93 aA  |
| <b>Pb content</b>                       |                    |                       |                     |                    |                              |                    |                     |                               |                     |
| Pb shoots ( $\text{ng g}^{-1}$ )        | 0.30 $\pm$ 0.08 cB | 1.02 $\pm$ 0.21 bB    | 2.70 $\pm$ 0.52 aB  | 0.48 $\pm$ 0.11    | 2.24 $\pm$ 0.62 bA           | 21.86 $\pm$ 7.89   | 0.52 $\pm$ 0.13 cA  | 2.42 $\pm$ 0.59 bA            | 15.01 $\pm$ 4.68 aA |
| Pb roots ( $\text{ng g}^{-1}$ DW)       | 0.28 $\pm$ 0.10 cB | 14.41 $\pm$ 3.78      | 33.15 $\pm$ 10.11   | 0.86 $\pm$ 0.38 cA | 8.89 $\pm$ 2.56 bA           | 92.24 $\pm$ 21.56  | 3.48 $\pm$ 1.60 bA  | 11.76 $\pm$ 4.58 bA           | 125.73 $\pm$ 38.96  |
| Transfer coefficient                    |                    | 0.07                  | 0.09                |                    | 0.27                         | 0.25               |                     | 0.23                          | 0.13                |

\*Values are given as mean  $\pm$  SE ( $n=4-6$ ). For each phase and organ, different lowercase mean significant differences between treatments among the same population, and different uppercase letters mean significant differences between populations among the same Pb dose ( $p < 0.05$ ).

**Table S2.** Percentage (%) of nuclei in each of the three identified peaks in leaves and roots of control and exposed plants: Peak I – G<sub>0</sub>/G<sub>1</sub> phase of the subpopulation A; Peak II - G<sub>0</sub>/G<sub>1</sub> phase of subpopulation B together with the G<sub>2</sub> phase of subpopulation A; Peak III - G<sub>2</sub> phase of the subpopulation B\*.

|            |        | Pb (μM) | Nuclei (%)                  |                                                          |                             |
|------------|--------|---------|-----------------------------|----------------------------------------------------------|-----------------------------|
|            |        |         | G <sub>1</sub> <sup>A</sup> | G <sub>1</sub> <sup>B</sup> +G <sub>2</sub> <sup>A</sup> | G <sub>2</sub> <sup>B</sup> |
| NM         | Leaves | 0       | 44.0 ± 7.6 bB               | 43.8 ± 4.3 aA                                            | 12.2 ± 5.8 aA               |
|            |        | 5       | 54.2 ± 2.2 aB               | 38.0 ± 3.4 abA                                           | 7.8 ± 2.4 aA                |
|            |        | 20      | 59.2 ± 3.8 aA               | 34.7 ± 3.6 bA                                            | 6.0 ± 1.8 aA                |
|            | Roots  | 0       | 44.6 ± 6.9 aA               | 42.3 ± 3.7 aA                                            | 13.1 ± 3.9 aA               |
|            |        | 5       | 50.5 ± 6.3 aA               | 38.1 ± 3.2 aA                                            | 11.4 ± 3.8 aA               |
|            |        | 20      | 53.2 ± 9.6 aA               | 39.7 ± 6.2 aA                                            | 7.1 ± 3.7 aB                |
| ‘Agustin’  | Leaves | 0       | 63.5 ± 5.8 aA               | 26.8 ± 3.4 aB                                            | 9.7 ± 3.8 aA                |
|            |        | 5       | 64.1 ± 3.6 aA               | 27.2 ± 2.4 aB                                            | 8.8 ± 1.7 aA                |
|            |        | 20      | 62.4 ± 5.5 aA               | 30.2 ± 4.6 aA                                            | 7.4 ± 3.5 aA                |
|            | Roots  | 0       | 51.4 ± 3.0 bA               | 39.71 ± 3.5 aA                                           | 8.9 ± 3.2 aA                |
|            |        | 5       | 59.4 ± 9.0 abA              | 34.2 ± 5.0 abA                                           | 6.5 ± 4.7 aA                |
|            |        | 20      | 69.4 ± 10.4 aA              | 24.8 ± 8.8 bB                                            | 5.8 ± 2.9 aC                |
| ‘Mercader’ | Leaves | 0       | 59.4 ± 7.2 bA               | 32.3 ± 7.5 aB                                            | 8.3 ± 3.4 aA                |
|            |        | 5       | 70.8 ± 6.3 aA               | 21.8 ± 3.6 bB                                            | 7.4 ± 2.7 aA                |
|            |        | 20      | 61.3 ± 5.6 abA              | 30.9 ± 5.5 aA                                            | 7.8 ± 1.9 aA                |
|            | Roots  | 0       | 47.6 ± 7.1 aA               | 35.3 ± 5.2 aA                                            | 17.1 ± 3.4 aA               |
|            |        | 5       | 55.0 ± 13.6 aA              | 32.7 ± 6.6 aA                                            | 12.3 ± 4.7 aA               |
|            |        | 20      | 56.7 ± 7.4 aA               | 29.6 ± 6.5 aAB                                           | 13.7 ± 1.9 aA               |

\*Values are given as mean ± SE (n=4-6). For each phase and organ, different lowercase mean significant differences between treatments among the same population, and different uppercase letters mean significant differences between populations among the same Pb dose (p < 0.05).

**Table S3.** Total antioxidant activity, AsA (ascorbate), DHA (dehydroascorbate), reduced glutathione (GSH) and soluble total non-protein thiols (NPT), total soluble phenolics (TPC), hydroxycinnamic acids (HCA), flavonoids, flavanols, lignin, H<sub>2</sub>O<sub>2</sub>, MDA, and carbonyl (C=O) contents in shoots from non-mining (NM) and mining ('Agustin' and 'Mercader') *Z. fabago* populations exposed to 0, 5 and 20  $\mu$ M Pb(NO<sub>3</sub>)<sub>2</sub> for 4 weeks. \*.

| Shoots                                                        | NM                    |                       |                       | 'Agustin'             |                      |                       | 'Mercader'           |                      |                       |
|---------------------------------------------------------------|-----------------------|-----------------------|-----------------------|-----------------------|----------------------|-----------------------|----------------------|----------------------|-----------------------|
|                                                               | 0 $\mu$ M             | 5 $\mu$ M             | 20 $\mu$ M            | 0 $\mu$ M             | 5 $\mu$ M            | 20 $\mu$ M            | 0 $\mu$ M            | 5 $\mu$ M            | 20 $\mu$ M            |
| ABTS ( $\mu$ mol GA eq. g <sup>-1</sup> FW)                   | 3.45 $\pm$ 0.09 cA    | 4.63 $\pm$ 0.08 bA    | 5.16 $\pm$ 0.14 aA    | 3.50 $\pm$ 0.06 bA    | 3.65 $\pm$ 0.11 bB   | 4.53 $\pm$ 0.09 aB    | 3.39 $\pm$ 0.03 aA   | 3.30 $\pm$ 0.18 aB   | 3.29 $\pm$ 0.04 aB    |
| DPPH ( $\mu$ mol GA eq. g <sup>-1</sup> FW)                   | 1.97 $\pm$ 0.12 aA    | 2.18 $\pm$ 0.20 aA    | 2.38 $\pm$ 0.23 aA    | 2.18 $\pm$ 0.09 aA    | 2.01 $\pm$ 0.07 aA   | 2.34 $\pm$ 0.10 aA    | 1.91 $\pm$ 0.10 aA   | 1.73 $\pm$ 0.16 aA   | 1.72 $\pm$ 0.09 aB    |
| FRAP ( $\mu$ mol Fe(II) g <sup>-1</sup> FW)                   | 10.80 $\pm$ 0.35 bC   | 10.29 $\pm$ 0.30 bB   | 12.98 $\pm$ 0.24 aB   | 14.43 $\pm$ 0.21 bA   | 13.67 $\pm$ 0.39 bA  | 15.53 $\pm$ 0.21 aA   | 13.60 $\pm$ 0.31 aB  | 10.49 $\pm$ 0.71 bB  | 9.28 $\pm$ 0.16 bC    |
| AsA ( $\mu$ mol g <sup>-1</sup> FW)                           | 0.64 $\pm$ 0.01 aB    | 0.58 $\pm$ 0.01 aC    | 0.67 $\pm$ 0.01 aB    | 0.94 $\pm$ 0.02 aA    | 0.99 $\pm$ 0.02 aA   | 1.00 $\pm$ 0.05 aA    | 0.88 $\pm$ 0.01 aA   | 0.77 $\pm$ 0.01 bB   | 0.66 $\pm$ 0.02 cB    |
| DHA ( $\mu$ mol g <sup>-1</sup> FW)                           | 0.32 $\pm$ 0.03 aA    | 0.25 $\pm$ 0.04 aA    | 0.14 $\pm$ 0.01 bC    | 0.27 $\pm$ 0.02 bA    | 0.34 $\pm$ 0.02 aA   | 0.39 $\pm$ 0.02 aA    | 0.18 $\pm$ 0.03 bB   | 0.18 $\pm$ 0.01 bB   | 0.26 $\pm$ 0.01 aB    |
| AsA/DHA                                                       | 1.98 $\pm$ 0.20 b C   | 2.33 $\pm$ 0.40 b B   | 4.85 $\pm$ 0.61 a A   | 3.53 $\pm$ 0.36 a B   | 2.93 $\pm$ 0.27 a B  | 2.58 $\pm$ 0.23 a B   | 4.96 $\pm$ 0.82 a A  | 4.32 $\pm$ 0.29 a A  | 2.51 $\pm$ 0.21 b B   |
| GSH (nmol g <sup>-1</sup> FW)                                 | 20.61 $\pm$ 0.26 bA   | 34.26 $\pm$ 1.29 aA   | 39.23 $\pm$ 0.60 aA   | 22.59 $\pm$ 0.23 cA   | 26.84 $\pm$ 0.32 bB  | 39.02 $\pm$ 1.41 aA   | 17.95 $\pm$ 0.28 cB  | 25.46 $\pm$ 0.46 bB  | 29.64 $\pm$ 1.13 aB   |
| NPT (nmol g <sup>-1</sup> FW)                                 | 393.44 $\pm$ 14.02 cA | 571.43 $\pm$ 15.86 bA | 660.17 $\pm$ 11.22 aA | 333.82 $\pm$ 11.09 bB | 336.44 $\pm$ 6.54 bB | 436.08 $\pm$ 24.32 aB | 377.59 $\pm$ 6.73 aA | 326.50 $\pm$ 7.25 aB | 339.45 $\pm$ 26.51 aC |
| TPC ( $\mu$ mol gallic acid eq. g <sup>-1</sup> FW)           | 14.24 $\pm$ 0.10 c A  | 16.54 $\pm$ 0.24 bA   | 19.94 $\pm$ 0.18 aA   | 14.28 $\pm$ 0.24 bA   | 16.05 $\pm$ 0.43 bA  | 19.13 $\pm$ 0.12 aB   | 14.33 $\pm$ 0.18 aA  | 13.11 $\pm$ 0.65 abB | 12.84 $\pm$ 0.20 bC   |
| HCAs ( $\mu$ mol caffeic acid eq. g <sup>-1</sup> FW)         | 3.10 $\pm$ 0.11 a B   | 2.38 $\pm$ 0.07 bC    | 2.44 $\pm$ 0.09 bB    | 4.43 $\pm$ 0.05 aA    | 2.86 $\pm$ 0.08 bB   | 2.46 $\pm$ 0.14 bB    | 4.29 $\pm$ 0.12 aA   | 4.28 $\pm$ 0.22 aA   | 4.18 $\pm$ 0.18 aA    |
| Flavonoids ( $\mu$ mol rutin eq. g <sup>-1</sup> FW)          | 0.96 $\pm$ 0.08 a A   | 1.33 $\pm$ 0.22 aA    | 0.49 $\pm$ 0.08 bA    | 1.12 $\pm$ 0.04 aA    | 0.63 $\pm$ 0.11 bB   | 0.66 $\pm$ 0.04 bA    | 1.01 $\pm$ 0.04 aA   | 0.48 $\pm$ 0.04 bB   | 0.57 $\pm$ 0.09 bA    |
| Flavanols (nmol catechin eq. g <sup>-1</sup> FW)              | 30.71 $\pm$ 1.09 a B  | 8.30 $\pm$ 2.97 bC    | 5.24 $\pm$ 1.81 bC    | 43.12 $\pm$ 1.05 aA   | 19.82 $\pm$ 1.49 bB  | 23.77 $\pm$ 0.80 bB   | 44.81 $\pm$ 1.41 aA  | 38.86 $\pm$ 3.18 aA  | 49.21 $\pm$ 3.03 aA   |
| Lignin (mg LTGA g <sup>-1</sup> DW)                           | 8.03 $\pm$ 0.17 aA    | 7.29 $\pm$ 0.06 aA    | 8.01 $\pm$ 0.05 aA    | 5.02 $\pm$ 0.15 aB    | 5.63 $\pm$ 0.05 aB   | 6.88 $\pm$ 0.06 aB    | 3.49 $\pm$ 0.03 aC   | 3.66 $\pm$ 0.18 aC   | 2.89 $\pm$ 0.17 aC    |
| MDA (nmol g <sup>-1</sup> FW)                                 | 7.23 $\pm$ 0.62 aAB   | 7.08 $\pm$ 1.46 aA    | 8.78 $\pm$ 1.51 aB    | 6.58 $\pm$ 0.34 bB    | 8.81 $\pm$ 0.53 aA   | 9.66 $\pm$ 1.91 aA    | 8.80 $\pm$ 0.48 aA   | 8.68 $\pm$ 0.81 aA   | 9.87 $\pm$ 0.63 aA    |
| C=O (nmol mg protein <sup>-1</sup> )                          | 21.05 $\pm$ 0.43 bA   | 43.77 $\pm$ 0.50 aA   | 38.52 $\pm$ 1.47 aA   | 14.24 $\pm$ 0.34 bC   | 13.85 $\pm$ 0.88 bC  | 17.50 $\pm$ 1.50 aB   | 17.97 $\pm$ 0.11bB   | 20.65 $\pm$ 0.37 aB  | 20.40 $\pm$ 1.37 aB   |
| H <sub>2</sub> O <sub>2</sub> ( $\mu$ mol g <sup>-1</sup> FW) | 0.60 $\pm$ 0.01 cA    | 0.82 $\pm$ 0.01 bA    | 0.93 $\pm$ 0.02 aA    | 0.45 $\pm$ 0.02 cB    | 0.49 $\pm$ 0.01 bB   | 0.62 $\pm$ 0.04 aB    | 0.46 $\pm$ 0.01 bB   | 0.51 $\pm$ 0.01 abB  | 0.56 $\pm$ 0.04 aB    |

\*Values are given as mean  $\pm$  SE ( $n=4-6$ ). For each phase and organ, different lowercase mean significant differences between treatments among the same population, and different uppercase letters mean significant differences between populations among the same Pb dose ( $p < 0.05$ ).

**Table S4.** Total antioxidant activity, AsA (ascorbate), DHA (dehydroascorbate), reduced glutathione (GSH) and soluble total non-protein thiols (NPT), total soluble phenolics (TPC), hydroxycinnamic acids (HCA), lignin, H<sub>2</sub>O<sub>2</sub>, MDA, and carbonyl (C=O) contents in roots of nonmetalliferous (NM) and metalliferous (‘Agustin’ and ‘Mercader’) *Z. fabago* seedlings grown in the presence of increasing Pb concentrations (0, 5, and 20 µM) for 4 weeks\*.

| Roots                                                   | NM                |                   |                   | ‘Agustin’         |                   |                   | ‘Mercader’        |                   |                  |
|---------------------------------------------------------|-------------------|-------------------|-------------------|-------------------|-------------------|-------------------|-------------------|-------------------|------------------|
|                                                         | 0 µM              | 5 µM              | 20 µM             | 0 µM              | 5 µM              | 20 µM             | 0 µM              | 5 µM              | 20 µM            |
| ABTS (µmol GA eq. g <sup>-1</sup> FW)                   | 0.64 ± 0.10 aB    | 0.46 ± 0.09 aB    | 0.52 ± 0.13 aB    | 0.91 ± 0.05 aA    | 0.77 ± 0.03 bA    | 0.94 ± 0.04 aA    | 1.04 ± 0.05 aA    | 0.76 ± 0.06 bA    | 0.56 ± 0.05 cB   |
| DPPH (µmol GA eq. g <sup>-1</sup> FW)                   | 2.93 ± 0.28 aA    | 2.83 ± 0.21 aA    | 3.18 ± 0.34 aA    | 2.03 ± 0.08 aB    | 1.43 ± 0.13 bB    | 1.81 ± 0.08 aB    | 2.02 ± 0.11 aB    | 1.22 ± 0.18 bB    | 0.93 ± 0.07 bC   |
| FRAP (µmol Fe(II) g <sup>-1</sup> FW)                   | 6.82 ± 0.17 aB    | 3.63 ± 0.43 bB    | 4.92 ± 0.47 bB    | 7.28 ± 0.26 aB    | 4.50 ± 0.22 bA    | 6.96 ± 0.14 aA    | 10.17 ± 0.53 aA   | 3.50 ± 0.25 bB    | 2.96 ± 0.18 bC   |
| AsA (µmol g <sup>-1</sup> FW)                           | 0.23 ± 0.01 aA    | 0.21 ± 0.01 bA    | 0.17 ± 0.03 bB    | 0.15 ± 0.01 bB    | 0.14 ± 0.01 bB    | 0.24 ± 0.01 aA    | 0.23 ± 0.01 aA    | 0.14 ± 0.01 bB    | 0.12 ± 0.01 bC   |
| DHA (µmol g <sup>-1</sup> FW)                           | 0.23 ± 0.03 bA    | 0.20 ± 0.01 bA    | 0.36 ± 0.03 aA    | 0.19 ± 0.01 aA    | 0.13 ± 0.01 bB    | 0.14 ± 0.02 bB    | 0.16 ± 0.01 aB    | 0.14 ± 0.01 aB    | 0.18 ± 0.01 aB   |
| AsA/DHA                                                 | 1.00 ± 0.16 a B   | 1.05 ± 0.10 a A   | 0.48 ± 0.16 b B   | 0.79 ± 0.05 b B   | 1.04 ± 0.17 abA   | 1.75 ± 0.36 aA    | 1.41 ± 0.82 aA    | 1.08 ± 0.29 bA    | 0.68 ± 0.21 cB   |
| GSH (nmol g <sup>-1</sup> FW)                           | 30.03 ± 1.80 aA   | 32.86 ± 0.47 aA   | 33.13 ± 1.37 aA   | 29.16 ± 0.37 bA   | 34.03 ± 0.66 aA   | 36.38 ± 2.34 aA   | 28.76 ± 0.27 cA   | 32.64 ± 0.65 bA   | 37.86 ± 1.69 aA  |
| NPT (nmol g <sup>-1</sup> FW)                           | 823.52 ± 50.59 aA | 653.22 ± 12.95 bA | 674.39 ± 42.68 bA | 325.97 ± 10.60 aB | 267.36 ± 17.59 aC | 350.52 ± 16.06 aB | 363.99 ± 25.69 aB | 373.28 ± 28.04 aB | 263.69 ± 8.25 bC |
| TPC (µmol gallic acid eq. g <sup>-1</sup> FW)           | 3.00 ± 0.07 bA    | 2.91 ± 0.03 bA    | 3.60 ± 0.25 aA    | 2.50 ± 0.04 bB    | 2.43 ± 0.03 bB    | 3.31 ± 0.18 aA    | 2.94 ± 0.09 aA    | 2.56 ± 0.05 bB    | 2.17 ± 0.03 cB   |
| HCAs (µmol caffeic acid eq. g <sup>-1</sup> FW)         | 0.62 ± 0.17 aB    | 0.20 ± 0.16 abB   | 0.11 ± 0.05 bB    | 1.12 ± 0.21 aA    | 0.91 ± 0.12 aA    | 0.55 ± 0.05 bA    | 0.41 ± 0.06 aB    | 0.19 ± 0.07 bB    | 0.15 ± 0.03 bB   |
| Lignin (mg LTGA g <sup>-1</sup> DW)                     | 10.28 ± 0.33 aC   | 11.37 ± 0.38 aA   | 10.47 ± 0.52 aC   | 11.44 ± 0.56 aB   | 8.06 ± 0.57 aC    | 12.10 ± 0.09 aA   | 12.84 ± 0.15 aA   | 10.61 ± 0.05 aB   | 11.48 ± 0.16 aB  |
| MDA (nmol g <sup>-1</sup> FW)                           | 3.55 ± 1.15 bA    | 3.30 ± 1.39 bA    | 6.22 ± 1.00 aA    | 1.49 ± 0.79 aA    | 2.73 ± 0.91 aA    | 3.60 ± 0.72 aB    | 2.36 ± 0.73 aA    | 1.94 ± 0.47 aA    | 3.03 ± 0.26 aB   |
| C=O (nmol mg protein <sup>-1</sup> )                    | 65.37 ± 0.78 bA   | 62.70 ± 2.10 bA   | 97.70 ± 1.49 aA   | 49.74 ± 2.97 bB   | 56.32 ± 0.69 aB   | 59.76 ± 1.12 aB   | 40.39 ± 0.19 bC   | 38.32 ± 0.61 bC   | 52.35 ± 0.78 aC  |
| H <sub>2</sub> O <sub>2</sub> (µmol g <sup>-1</sup> FW) | 1.05 ± 0.05 aA    | 0.84 ± 0.01 bA    | 0.83 ± 0.06 bA    | 0.41 ± 0.01 aC    | 0.33 ± 0.02 bC    | 0.40 ± 0.02 aB    | 0.48 ± 0.04 aB    | 0.47 ± 0.04 aB    | 0.32 ± 0.01 bC   |

\*Values are given as mean ± SE (*n*=4-6). For each phase and organ, different lowercase mean significant differences between treatments among the same population, and different uppercase letters mean significant differences between populations among the same Pb dose (*p* < 0.05).
